# Supplementary material for: Genetic evaluation supports differential diagnosis in adolescent patients with delayed puberty
Source: PubMed Central journal article supplement (PMC8558847; doi:10.1530/eje-21-0387), 2021-08-17
Supplement: supplementary_table_2.pdf [file supplementary_table_2.pdf]

**Table S2.** 2X2 table for analysis of the utility of genotypic diagnosis to diagnosis IHH in patients with pubertal delay (n=46)

|                     |         | Final clinical diagnosis |             |
|---------------------|---------|--------------------------|-------------|
|                     |         | IHH (n=21)               | SLDP (n=25) |
| Genotypic diagnosis | IHH     | 7                        | 0           |
|                     | Non-IHH | 14                       | 25          |
