# Supplementary material for: Genetic evaluation supports differential diagnosis in adolescent patients with delayed puberty
Source: PubMed Central journal article supplement (PMC8558847; doi:10.1530/eje-21-0387), 2021-08-17
Supplement: supplementary_table_3.pdf [file supplementary_table_3.pdf]

**Table S3.** Clinical data for family members of probands 10, 13 and 14

| Proband 10                         |                                                                                       |                                        |                                      |                                           |                                      |                                                                                                 |
|------------------------------------|---------------------------------------------------------------------------------------|----------------------------------------|--------------------------------------|-------------------------------------------|--------------------------------------|-------------------------------------------------------------------------------------------------|
| Proband Genotype                   | Minor allele frequency                                                                | Maternal phenotype                     | Maternal genotype                    | Paternal phenotype                        | Paternal genotype                    | Consanguinity                                                                                   |
| TAC3_ c.209-1G>C Homozygous        | 0.1% African/African American; known founder mutation in the Congolese population (1) | Delayed puberty, AAM 15.5 yrs          | TAC3_ c.209-1G>C Heterozygous        | Not available                             | Not available                        | Not known, but parents both from families originally from the same geographical region of Congo |
| Proband 13 & 14                    |                                                                                       |                                        |                                      |                                           |                                      |                                                                                                 |
| Genotype                           | Minor allele frequency                                                                | Maternal phenotype                     | Maternal genotype                    | Paternal phenotype                        | Paternal genotype                    | Consanguinity                                                                                   |
| GNRHR_ c.317A>G_p.Q106R Homozygous | 0.4% Non-European Finnish                                                             | Delayed puberty, B2 14 yrs, AAM 16 yrs | GNRHR_ c.317A>G_p.Q106R Heterozygous | Self-recalled normal age of puberty onset | GNRHR_ c.317A>G_p.Q106R Heterozygous | Nil                                                                                             |

## Reference

1. Young J, Bouligand J, Francou B, Raffin-Sanson ML, Gaillez S, Jeanpierre M, et al.

TAC3 and TACR3 defects cause hypothalamic congenital hypogonadotropic hypogonadism in humans. *The Journal of clinical endocrinology and metabolism.* 2010;95(5):2287-95.
